# Supplementary material
Source: PubMed Central journal article supplement (PMC2481327)
Supplement: 0712144105_0712144105SI.pdf [file 0712144105_0712144105SI.pdf]

# Supporting Information

Utlely *et al.* 10.1073/pnas.0712144105

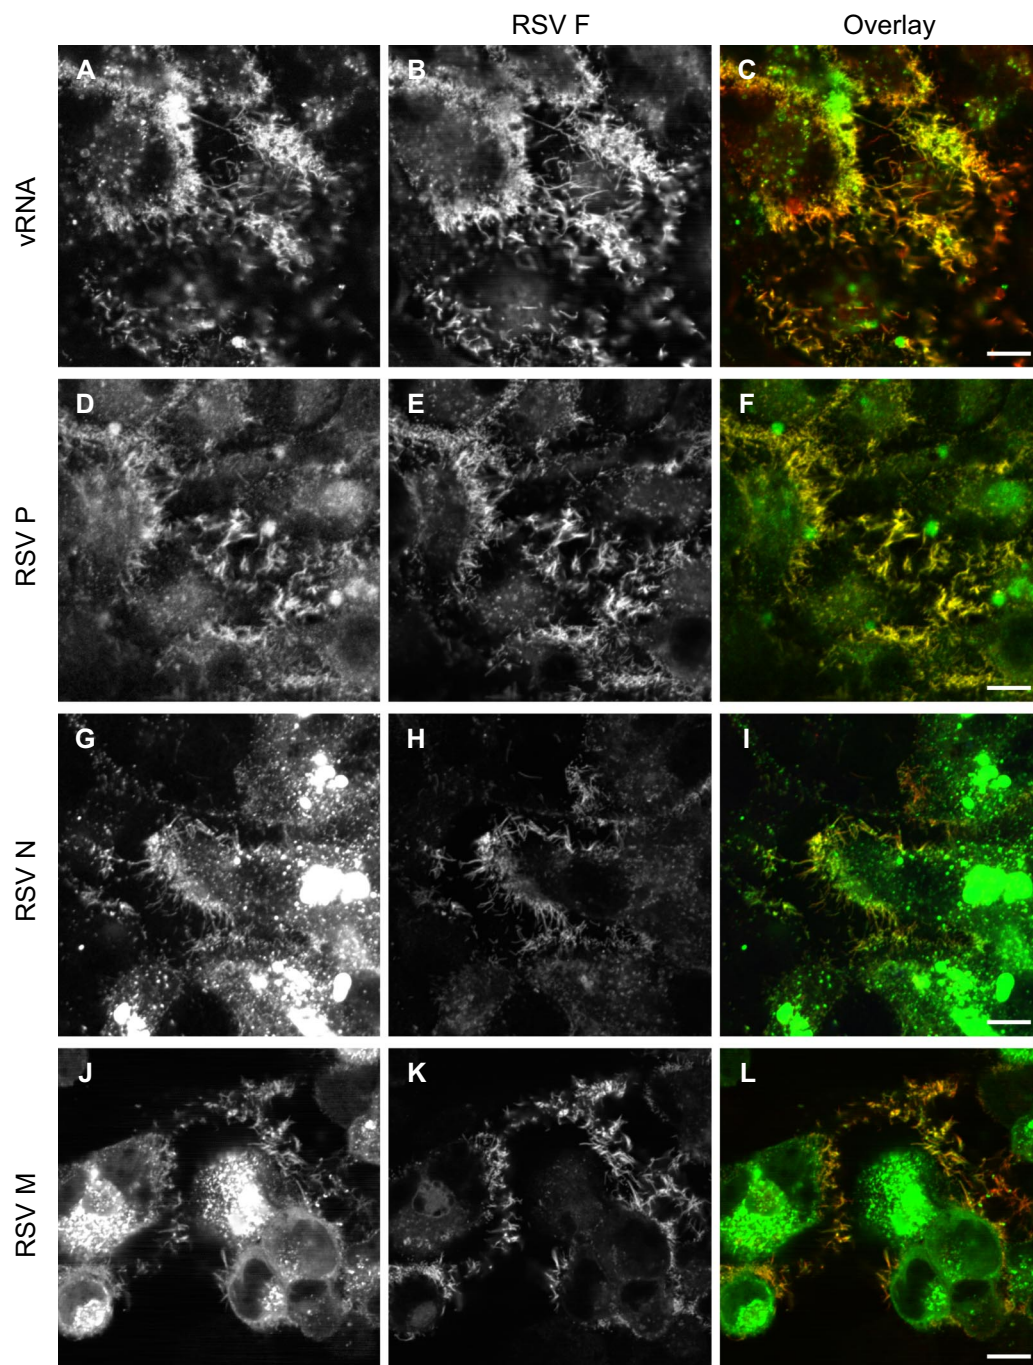

**Fig. S1.** Viral filaments contain all of the necessary RSV structural proteins. (A, D, G, and J) FIP2- $\Delta$ C2 cells infected with RSV for 3 days were assayed for the presence of genomic vRNA with molecular beacons (A) or by indirect immunofluorescence for the major structural proteins P, N, and M (D, G, and J, respectively). (B, C, E, F, H, I, K, and L) Localization of surface filaments is demonstrated by indirect immunofluorescence of the RSV F protein, which decorates surface filaments (B, E, H, and K). Genomic vRNA, viral structural proteins P, N, or M are pseudocolored green, and RSV F glycoprotein is pseudocolored red in the merged images (C, F, I, and L, respectively).

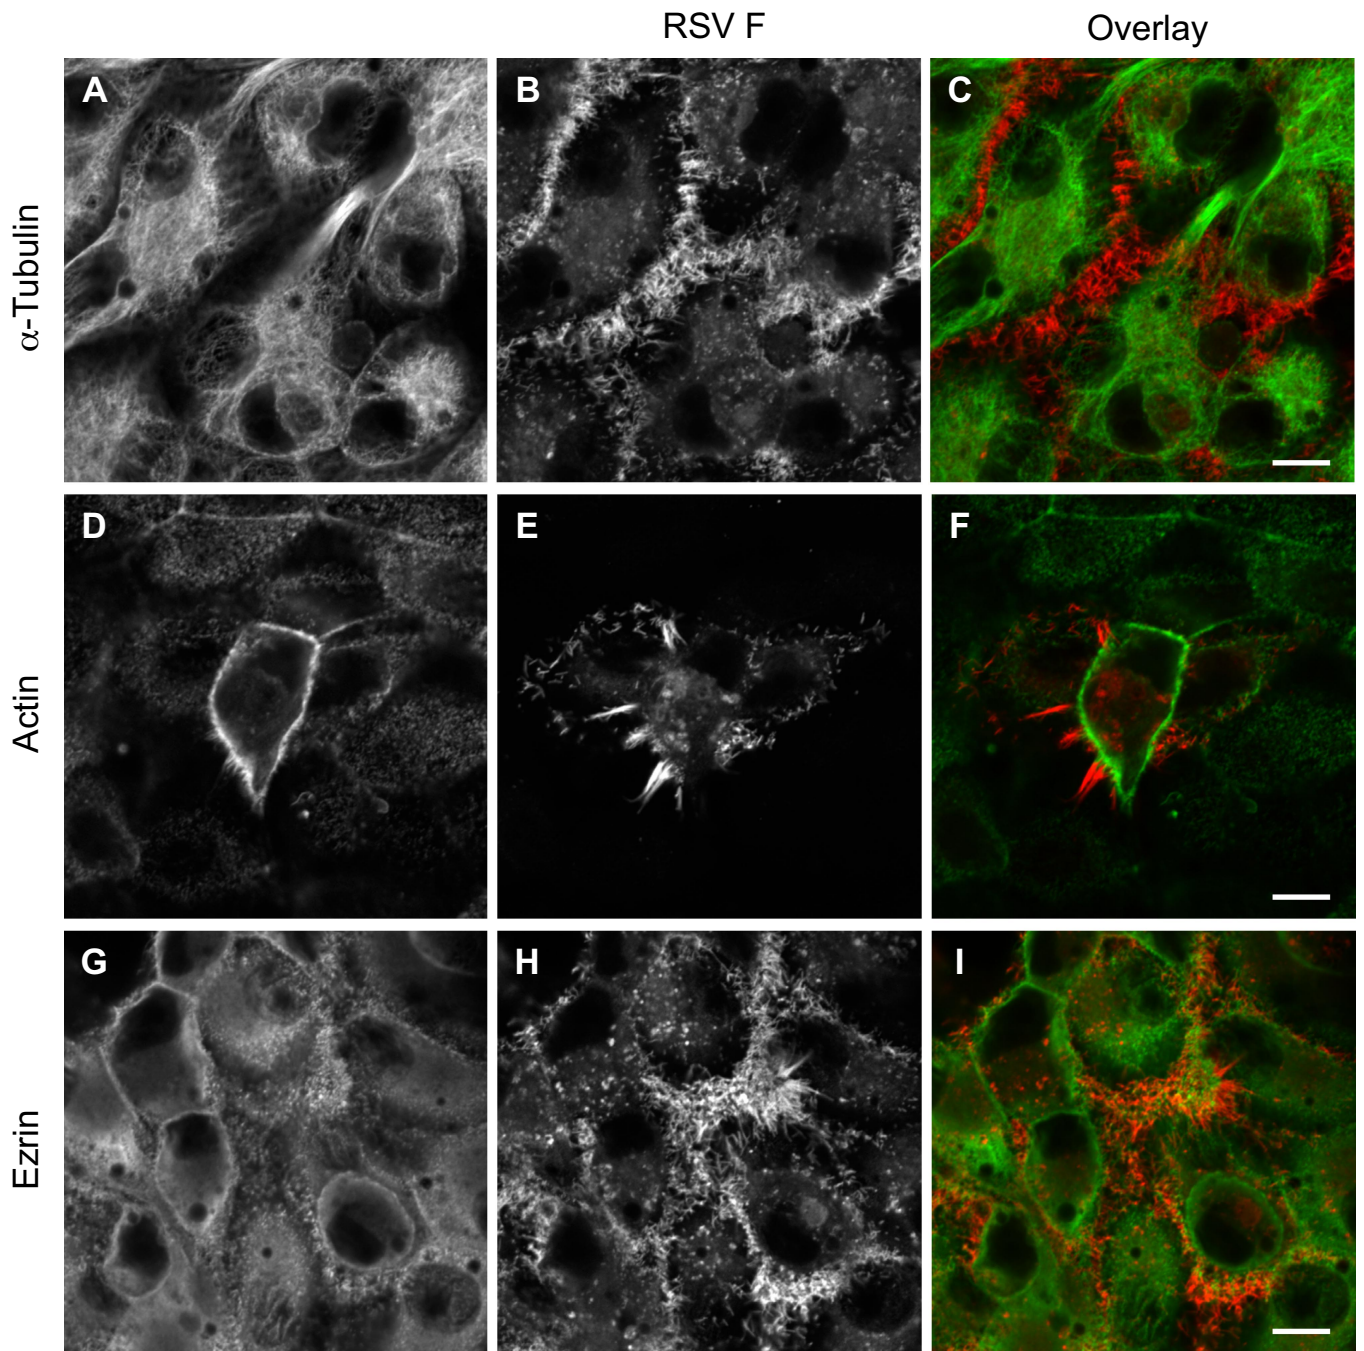

**Fig. S2.** Virus-induced filaments do not contain major cytoskeletal elements. (A, D, and G) FIP2- $\Delta$ C2 cells inoculated with RSV were assayed 3 days later for the presence of microtubules, actin, or ezrin, respectively, in surface filaments by fluorescence microscopy. (B, E, and H) Localization of surface filaments is demonstrated by indirect immunofluorescence detection of RSV F protein. (C, F, and I) Cytoskeletal elements are pseudocolored green, and RSV F glycoprotein is pseudocolored red in the merged images.

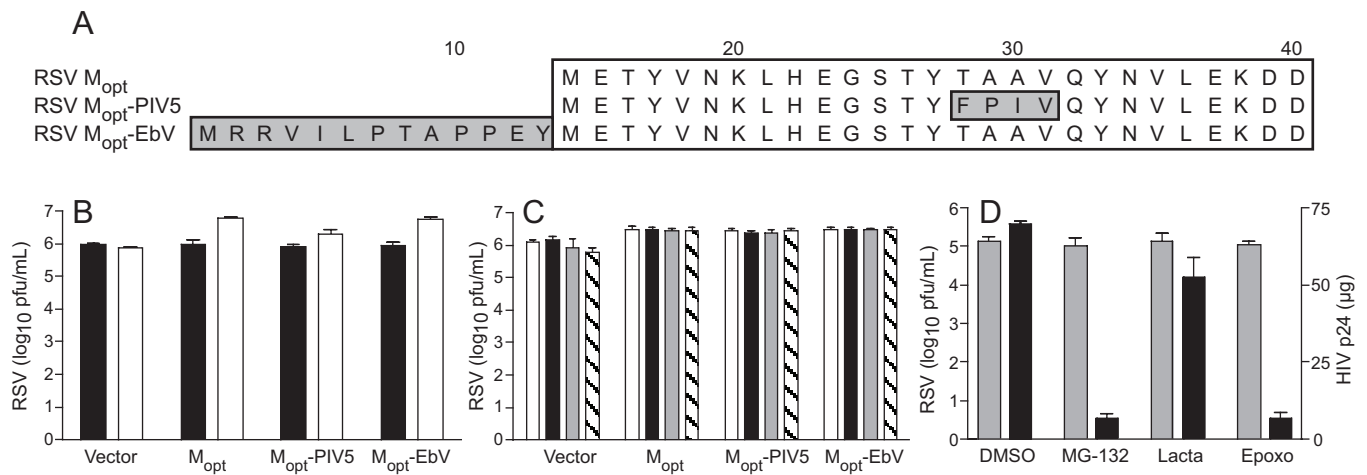

**Fig. S3.** Neither proteasome inhibitors nor insertion of a strong late domain alter RSV budding. (A) RSV matrix protein variant sequences are aligned to show the N-terminal 40 aa of optimized RSV matrix ( $M_{opt}$ ) and location of the engineered insertion of the FPIV late domain from PIV5 ( $M_{opt}$ -PIV5) or the N-terminal 15 aa including the PTAPPEY late domain of Ebola virus ( $M_{opt}$ -EbV). (B) HEP-2 cells transfected with M protein variants were inoculated with RSV at a moi of 0.25. Cell-associated titer (filled squares) and supernatant virus titer (open squares) were determined by plaque assay on day 5. (C) HEP-2 cells were cotransfected with DNA encoding a RSV M protein variant and EGFP (white bars), Vps4a-EGFP (black bars), Vps4a-K173Q (gray bars), or Vps4a-E228Q (striped bars). Cells were inoculated 24 h later with RSV at a moi of 0.25. Supernatant virus titer was determined by plaque assay on day 5. Transfection stability of Vps4 constructs was checked before collection by epifluorescence; expression was confirmed in all cases. RSV M proteins were tested separately for transfection stability (data not shown). (D) To determine the effect of proteasome inhibitors, HEP-2 cells were infected with RSV or HIV<sub>NL4-3</sub> at a moi of 2.0 and then incubated with either DMSO vehicle or the inhibitors epoxomicin (Epoxo), lactacystin (Lacta), or MG-132. RSV supernatant plaque titer (gray bars) or HIV supernatant p24 (black bars) were determined at 48 h. Data shown are mean  $\pm$  SD.
